# Supplementary material for: Alstolarines A and B, two unusual monoterpenoid indole alkaloids with an acetal moiety from Alstonia scholaris
Source: Royal Society of Chemistry journal article supplement (doi:10.1039/d0qo00751j), 2020-01-01
Supplement: d0qo00751j1.pdf [file d0qo00751j1.pdf]

## Supporting Information

### **Alstolarines A and B, Two Unusual Monoterpenoid Indole Alkaloids with Acetal Moiety from *Alstonia scholaris*†**

Jian Zhang,<sup>‡</sup> Min Song,<sup>‡</sup> Yun-Lin Ao, Yong Li, Xue-Yi Zou, Jie Xu, Ying Wang, Dong-Mei Zhang, Xiao-Qi Zhang,<sup>\*</sup> and Wen-Cai Ye<sup>\*</sup>

Guangdong Provincial Engineering Research Center for Modernization of TCM, College of Pharmacy, Jinan University, Guangzhou 510632, P. R. China

\* Corresponding Authors. Tel./Fax: 020-8522-3994/020-8522-1559;

E-mail: xqzhang74@hotmail.com (Xiao-Qi Zhang); chywc@aliyun.com (Wen-Cai Ye)

## List of contents

S3. **Figure S1.** Experimental ECD spectrum of **1**

S3-4. X-ray crystallographic analysis of **1**

S5-9. Chemical calculation details for **2**

S10-11. Bioactivity assays

S12. HR-ESI-MS and UV and IR spectra of **1**

S13-15. 1D and 2D NMR spectra of **1** in CDCl<sub>3</sub>

S16. HR-ESI-MS and UV and IR spectra of **2**

S17-19. 1D and 2D NMR spectra of **2** in CD<sub>3</sub>OD

S20. HR-ESI-MS and UV and IR spectra of **3**

S21. 1D NMR spectra of **3** in CD<sub>3</sub>OD

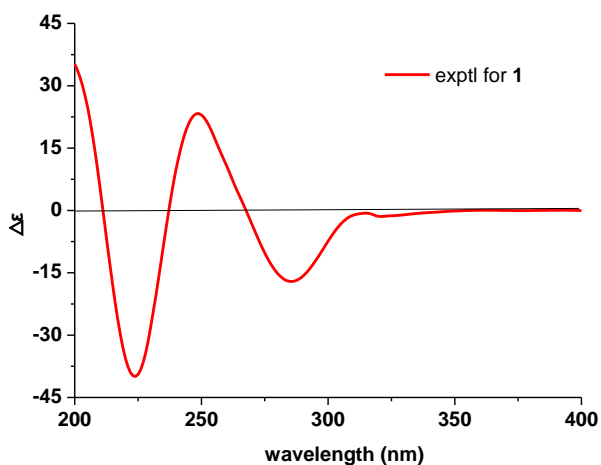

**Figure S1.** Experimental ECD spectrum of **1**.

### X-ray Crystallographic Analysis of **1**

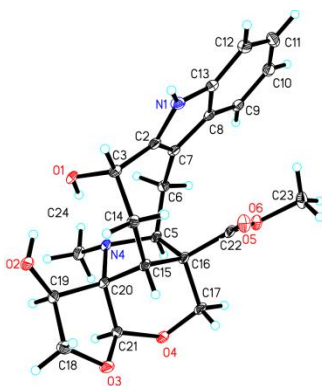

**Figure S2.** X-ray ORTEP drawing of **1** (thermal ellipsoid is scaled to the 30% probability level).

Compounds **1** were isolated as colorless block crystals via crystallization from  $\text{CH}_3\text{OH}$ . X-ray data were collected on an Agilent Gemini S Ultra CCD diffractometer with Cu K $\alpha$  radiation ( $\lambda = 1.54178 \text{ \AA}$ ). The structure was refined by full-matrix least squares on  $F^2$  using SHELXL-97 package software. Crystallographic data for **1** have been deposited at the Cambridge Crystallographic Data Centre as CCDC 1999251.

**Table S1.** Crystal data and structure refinement for **1**.

|                                             |                                                               |
|---------------------------------------------|---------------------------------------------------------------|
| Identification code                         | <b>1</b>                                                      |
| Empirical formula                           | C <sub>22</sub> H <sub>28</sub> N <sub>2</sub> O <sub>7</sub> |
| Formula weight                              | 432.46                                                        |
| Temperature/K                               | 100.00(10)                                                    |
| Crystal system                              | orthorhombic                                                  |
| Space group                                 | P2 <sub>1</sub> 2 <sub>1</sub> 2 <sub>1</sub>                 |
| a/Å                                         | 8.1650(2)                                                     |
| b/Å                                         | 14.1501(2)                                                    |
| c/Å                                         | 18.0594(3)                                                    |
| α/°                                         | 90                                                            |
| β/°                                         | 90                                                            |
| γ/°                                         | 90                                                            |
| Volume/Å <sup>3</sup>                       | 2086.50(7)                                                    |
| Z                                           | 4                                                             |
| ρ <sub>calc</sub> /g/cm <sup>3</sup>        | 1.377                                                         |
| μ/mm <sup>-1</sup>                          | 0.857                                                         |
| F(000)                                      | 920.0                                                         |
| Crystal size/mm <sup>3</sup>                | 0.15 × 0.13 × 0.12                                            |
| Radiation                                   | CuKα (λ = 1.54178)                                            |
| 2θ range for data collection/°              | 7.938 to 147.768                                              |
| Index ranges                                | -9 ≤ h ≤ 10, -17 ≤ k ≤ 17, -22 ≤ l ≤ 22                       |
| Reflections collected                       | 27233                                                         |
| Independent reflections                     | 4188 [R <sub>int</sub> = 0.0810, R <sub>sigma</sub> = 0.0346] |
| Data/restraints/parameters                  | 4188/0/291                                                    |
| Goodness-of-fit on F <sup>2</sup>           | 1.049                                                         |
| Final R indexes [I ≥ 2σ (I)]                | R <sub>1</sub> = 0.0507, wR <sub>2</sub> = 0.1349             |
| Final R indexes [all data]                  | R <sub>1</sub> = 0.0511, wR <sub>2</sub> = 0.1355             |
| Largest diff. peak/hole / e Å <sup>-3</sup> | 0.45/-0.35                                                    |
| Flack/Hooft parameter                       | -0.09(9)/-0.03(6)                                             |

**Chemical calculation details for 2:** The conformational analysis of compound **2** was performed in the SYBYL 8.1 program by using MMFF94s molecular force field, which afforded 35 conformers of **2**, with an energy cutoff of 10 kcal mol<sup>-1</sup> to the global minima. All the obtained conformers were further optimized using DFT at the B3LYP/6-31+G(d) level in acetonitrile by using Gaussian09 software,<sup>[1]</sup> and 8 conformers of **2** were selected. All of the optimized stable conformers were used for TDDFT computation of the excited states at the same levels, with the consideration of the first 30 excitations. The overall ECD curves of **2** were weighted by Boltzmann distribution of each conformer (with a half-bandwidth of 0.3 eV). The calculated ECD spectra of **2** were subsequently compared with the experimental one. The ECD spectra were produced by SpecDis 1.6 software.<sup>[2]</sup>

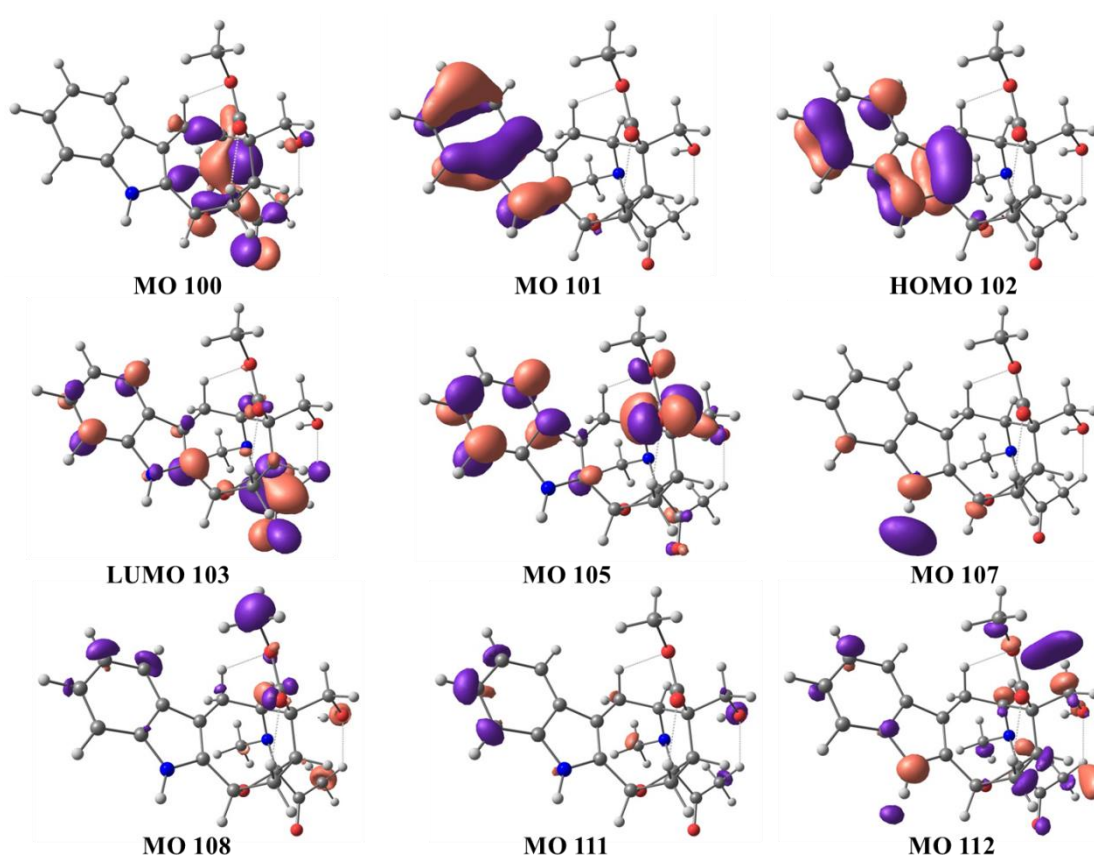

**Figure S3.** Key molecular orbitals involved in important transitions regarding the ECD spectra of conformer **2** in the gas phase at the B3LYP/6-31+G(d) level.

**Table S2.** Key transitions and their related rotatory and oscillator strengths of conformer **2** at the B3LYP/6-31+G(d) level in the gas phase.

| <b>HOMO is 102</b> |                                     |                            |                       |                          |                                                                                               |
|--------------------|-------------------------------------|----------------------------|-----------------------|--------------------------|-----------------------------------------------------------------------------------------------|
| <b>No.</b>         | <b>Energy<br/>(cm<sup>-1</sup>)</b> | <b>Wavelength<br/>(nm)</b> | <b>R<br/>(length)</b> | <b>Osc.<br/>Strength</b> | <b>Major contribs</b>                                                                         |
| 1                  | 33953.5218                          | 294.520258                 | 6.5796                | 0.0001                   | H-3->LUMO (27%),<br>H-2->LUMO (44%),<br>H-2->L+1 (12%)                                        |
| 2                  | 35129.47816                         | 284.6612169                | -7.7094               | 0.0244                   | HOMO->LUMO<br>(68%), HOMO->L+1<br>(16%), HOMO->L+2<br>(12%)                                   |
| 3                  | 35553.72578                         | 281.2644745                | 6.0481                | 0.014                    | HOMO->LUMO<br>(27%), HOMO->L+1<br>(53%), HOMO->L+2<br>(16%)                                   |
| 4                  | 36583.69579                         | 273.3458111                | 19.2242               | 0.0472                   | HOMO->L+1 (26%),<br>HOMO->L+2 (61%)                                                           |
| 5                  | 37866.92389                         | 264.0827132                | -6.4077               | 0.0762                   | H-1->LUMO (37%),<br>H-1->L+1 (20%),<br>H-1->L+2 (10%),<br>HOMO->L+6 (20%)                     |
| 6                  | 38967.06413                         | 256.6269803                | 1.9254                | 0.0016                   | HOMO->L+3 (75%),<br>HOMO->L+4 (21%)                                                           |
| 7                  | 39408.2494                          | 253.7539767                | -8.3238               | 0.0019                   | H-3->LUMO (22%),<br>H-2->LUMO (22%),<br>H-1->LUMO (22%),<br>H-1->L+1 (21%)                    |
| 8                  | 39855.88711                         | 250.9039624                | 12.5133               | 0.0119                   | H-1->L+1 (18%),<br>H-1->L+2 (29%),<br>HOMO->L+3 (11%),<br>HOMO->L+4 (37%)                     |
| 9                  | 39951.06053                         | 250.3062464                | -6.2047               | 0.0024                   | H-1->L+1 (12%),<br>H-1->L+2 (32%),<br>HOMO->L+4 (38%)                                         |
| 10                 | 40357.56396                         | 247.7850251                | 0.938                 | 0.0008                   | H-3->LUMO (16%),<br>H-2->LUMO (22%),<br>H-1->LUMO (28%),<br>H-1->L+1 (11%),<br>H-1->L+2 (11%) |
| 11                 | 40856.82116                         | 244.7571719                | -1.2242               | 0.0016                   | H-2->L+1 (71%),<br>H-2->L+2 (11%)                                                             |
| 12                 | 42048.10205                         | 237.8228627                | 9.2067                | 0.0044                   | HOMO->L+5 (87%)                                                                               |
| 13                 | 42529.61504                         | 235.1302731                | -1.0356               | 0.0035                   | H-2->L+2 (73%)                                                                                |
| 14                 | 42617.52947                         | 234.6452299                | -1.7947               | 0.0018                   | H-1->L+3 (44%),<br>H-1->L+4 (37%)                                                             |

|    |             |             |          |        |                                                                                            |
|----|-------------|-------------|----------|--------|--------------------------------------------------------------------------------------------|
| 15 | 43618.46352 | 229.2607119 | -12.7239 | 0.0125 | H-1->L+3 (34%),<br>H-1->L+4 (46%)                                                          |
| 16 | 43908.82311 | 227.7446602 | 0.0646   | 0.0052 | HOMO->L+6 (18%),<br>HOMO->L+7 (70%)                                                        |
| 17 | 43999.96377 | 227.2729144 | 4.8354   | 0.0037 | H-2->L+3 (74%)                                                                             |
| 18 | 44656.49907 | 223.9315712 | -14.7123 | 0.004  | H-7->L+1 (13%),<br>H-7->L+2 (15%),<br>H-6->L+1 (14%),<br>H-6->L+2 (15%),<br>H-3->L+1 (12%) |
| 19 | 44689.5678  | 223.7658696 | -14.9504 | 0.0992 | HOMO->L+6 (16%),<br>HOMO->L+8 (58%)                                                        |
| 20 | 44961.37664 | 222.4131187 | -13.9725 | 0.2621 | HOMO->L+6 (18%),<br>HOMO->L+8 (32%)                                                        |
| 21 | 45455.79451 | 219.9939547 | 15.8374  | 0.0192 | H-1->L+5 (70%)                                                                             |
| 22 | 45667.11177 | 218.9759679 | 8.8397   | 0.0905 | HOMO->L+9 (74%)                                                                            |
| 23 | 46074.42176 | 217.0401628 | 5.9131   | 0.0059 | H-3->LUMO (16%),<br>H-3->L+1 (47%)                                                         |
| 24 | 46513.99392 | 214.9890637 | 3.1236   | 0.0905 | HOMO->L+10 (68%)                                                                           |
| 25 | 46868.07131 | 213.3648712 | 5.454    | 0.0015 | H-5->LUMO (51%),<br>H-5->L+1 (12%),<br>H-4->LUMO (14%)                                     |
| 26 | 47118.90974 | 212.2290192 | -6.6826  | 0.0099 | HOMO->L+10 (14%),<br>HOMO->L+11 (76%)                                                      |
| 27 | 47170.52923 | 211.9967735 | 9.0806   | 0.0116 | H-2->L+4 (78%)                                                                             |
| 28 | 47484.2789  | 210.5960169 | -4.5488  | 0.0079 | H-3->L+2 (40%),<br>H-2->L+4 (11%),<br>H-1->L+6 (18%)                                       |
| 29 | 47523.80007 | 210.4208836 | 0.5218   | 0.0009 | H-3->L+2 (29%),<br>H-1->L+6 (16%),<br>H-1->L+7 (32%)                                       |
| 30 | 48074.67674 | 208.009719  | 19.1143  | 0.0122 | H-2->L+5 (49%),<br>H-1->L+8 (17%)                                                          |

---

**Table S3.** Cartesian coordinates of conformer **2**

| <b>Standard orientation:</b> |               |             |                         |          |          |  |
|------------------------------|---------------|-------------|-------------------------|----------|----------|--|
| Imaginary frequencies        | 0             |             |                         |          |          |  |
| E (Hartree)                  | -1300.31303   |             |                         |          |          |  |
| Center Number                | Atomic Number | Atomic Type | Coordinates (Angstroms) |          |          |  |
|                              |               |             | X                       | Y        | Z        |  |
| 1                            | 6             | 0           | 5.085532                | 0.017661 | 1.182961 |  |
| 2                            | 6             | 0           | 5.552311                | -0.88389 | 0.190349 |  |
| 3                            | 6             | 0           | 4.677782                | -1.56965 | -0.63284 |  |
| 4                            | 6             | 0           | 3.29981                 | -1.33442 | -0.44359 |  |
| 5                            | 6             | 0           | 2.808236                | -0.42684 | 0.549878 |  |
| 6                            | 6             | 0           | 3.732933                | 0.248657 | 1.368188 |  |
| 7                            | 7             | 0           | 2.189175                | -1.86988 | -1.10521 |  |
| 8                            | 6             | 0           | 1.007296                | -1.30727 | -0.54738 |  |
| 9                            | 6             | 0           | 1.355207                | -0.42394 | 0.463683 |  |
| 10                           | 6             | 0           | -0.29592                | -1.72888 | -1.15647 |  |
| 11                           | 7             | 0           | -1.91893                | -0.29905 | 1.382221 |  |
| 12                           | 6             | 0           | -0.89111                | 0.778069 | 1.184316 |  |
| 13                           | 6             | 0           | 0.581454                | 0.406299 | 1.422517 |  |
| 14                           | 6             | 0           | -0.93293                | -0.61221 | -2.00069 |  |
| 15                           | 6             | 0           | -1.83798                | 0.145535 | -1.02472 |  |
| 16                           | 6             | 0           | -2.16242                | -0.93074 | 0.067991 |  |
| 17                           | 6             | 0           | -3.58568                | -1.53921 | -0.08141 |  |
| 18                           | 6             | 0           | -4.69886                | -0.82871 | 0.616939 |  |
| 19                           | 6             | 0           | -1.6315                 | -1.27369 | 2.468503 |  |
| 20                           | 8             | 0           | -1.25744                | -2.04145 | -0.12058 |  |
| 21                           | 6             | 0           | -1.22123                | 1.341603 | -0.24184 |  |
| 22                           | 8             | 0           | -3.7566                 | -2.50441 | -0.78271 |  |
| 23                           | 6             | 0           | -0.01385                | 1.997673 | -0.9002  |  |
| 24                           | 8             | 0           | 0.425223                | 1.897929 | -2.01932 |  |
| 25                           | 8             | 0           | 0.527687                | 2.90584  | -0.00777 |  |
| 26                           | 6             | 0           | 1.717217                | 3.617617 | -0.44689 |  |
| 27                           | 6             | 0           | -2.27318                | 2.489481 | -0.1317  |  |
| 28                           | 8             | 0           | -3.55122                | 2.019949 | 0.284017 |  |
| 29                           | 1             | 0           | 5.816855                | 0.528457 | 1.805419 |  |
| 30                           | 1             | 0           | 6.626622                | -1.0316  | 0.084653 |  |
| 31                           | 1             | 0           | 5.027165                | -2.2604  | -1.39221 |  |
| 32                           | 1             | 0           | 3.381391                | 0.936654 | 2.133134 |  |
| 33                           | 1             | 0           | 2.216123                | -2.5299  | -1.85776 |  |
| 34                           | 1             | 0           | -0.2074                 | -2.6949  | -1.7051  |  |
| 35                           | 1             | 0           | -1.13478                | 1.564889 | 1.952656 |  |
| 36                           | 1             | 0           | 0.659471                | -0.08746 | 2.420913 |  |
| 37                           | 1             | 0           | 1.131658                | 1.375683 | 1.545051 |  |
| 38                           | 1             | 0           | -1.53939                | -1.04681 | -2.81886 |  |
| 39                           | 1             | 0           | -0.17863                | 0.027491 | -2.50218 |  |
| 40                           | 1             | 0           | -2.7624                 | 0.489392 | -1.54309 |  |



|    |   |   |          |          |          |
|----|---|---|----------|----------|----------|
| 41 | 1 | 0 | -4.82073 | 0.198073 | 0.22549  |
| 42 | 1 | 0 | -5.65706 | -1.34938 | 0.476596 |
| 43 | 1 | 0 | -4.51932 | -0.7386  | 1.697558 |
| 44 | 1 | 0 | -2.51634 | -1.91719 | 2.608443 |
| 45 | 1 | 0 | -1.44736 | -0.73609 | 3.409704 |
| 46 | 1 | 0 | -0.7738  | -1.93714 | 2.25081  |
| 47 | 1 | 0 | 1.823469 | 4.400289 | 0.310419 |
| 48 | 1 | 0 | 2.562083 | 2.91983  | -0.4423  |
| 49 | 1 | 0 | 1.563161 | 4.032166 | -1.4489  |
| 50 | 1 | 0 | -2.48503 | 2.943812 | -1.12031 |
| 51 | 1 | 0 | -1.92481 | 3.272388 | 0.569755 |
| 52 | 1 | 0 | -3.47258 | 1.501071 | 1.12622  |

[1] Gaussian 09, Revision A.02, M. J. Frisch, G. W. Trucks, H. B. Schlegel, G. E. Scuseria, M. A. Robb, J. R. Cheeseman, G. Scalmani, V. Barone, B. Mennucci, G. A. Petersson, H. Nakatsuji, M. Caricato, X. Li, H. P. Hratchian, A. F. Izmaylov, J. Bloino, G. Zheng, J. L. Sonnenberg, M. Hada, M. Ehara, K. Toyota, R. Fukuda, J. Hasegawa, M. Ishida, T. Nakajima, Y. Honda, O. Kitao, H. Nakai, T. Vreven, J. A. Montgomery, J. E. Peralta, F. Ogliaro, M. Bearpark, J. J. Heyd, E. Brothers, K. N. Kudin, V. N. Staroverov, R. Kobayashi, J. Normand, K. Raghavachari, A. Rendell, J. C. Burant, S. S. Iyengar, J. Tomasi, M. Cossi, N. Rega, J. M. Millam, M. Klene, J. E. Knox, J. B. Cross, V. Bakken, C. Adamo, J. Jaramillo, R. Gomperts, R. E. Stratmann, O. Yazyev, A. J. Austin, R. Cammi, C. Pomelli, J. W. Ochterski, R. L. Martin, K. Morokuma, V. G. Zakrzewski, G. A. Voth, P. Salvador, J. J. Dannenberg, S. Dapprich, A. D. Daniels, O. Farkas, J. B. Foresman, J. V. Ortiz, J. Cioslowski, and D. J. Fox, Gaussian, Inc., Wallingford CT, 2009.

[2] T. Bruhn, A. Schaumlöffel, Y. Hemberger, G. Bringmann, SpecDis version 1.60, University of Wuerzburg, Germany, 2012.

## **Bioactivity assays**

### **Vasorelaxant assay**

The vasorelaxant activity of the isolates against KCl-induced contractions of rat renal artery rings was measured as described previously. Renal arteries were removed rapidly from SD rats, immediately placed into 4 °C oxygenated K-H solution, cleaned of its surrounding fat and connective tissues, and then cut into about 2 mm in length. Each segment was mounted in a Multi Myograph System (Danish Myo Technology A/S, Denmark), and bathed in K-H solution [composition (in mmol L<sup>-1</sup>): NaCl, 120; KCl, 4.6; KH<sub>2</sub>PO<sub>4</sub>, 1.2; MgSO<sub>4</sub>, 1.2; NaHCO<sub>3</sub>, 25; glucose, 10; CaCl<sub>2</sub>, 2.5], bubbled with 95% O<sub>2</sub>–5% CO<sub>2</sub> and maintained at 37 °C. The isometric tension of renal artery rings was collected by four-channels psychological force transducers. All the rings were set to an optimal tension of 2 g and stabilized in normal K-H solution for 90 min. The rings were then contracted by 0.5 μmol·L<sup>-1</sup> phenylephrine and challenged with 3 μmol·L<sup>-1</sup> acetylcholine to confirm the integrity of the endothelium. Endothelium-intact rings contraction was evoked by a depolarizing KCl (60 mmol L<sup>-1</sup>) solution. The EC<sub>50</sub> values of the test compounds and the positive control (phentolamine mesylate) were calculated from cumulative concentration-tension curves by linear regression.

### **Acetylcholinesterase (AChE) inhibitory activity assay**

The AChE inhibitory activities of the compounds were assayed by a modified Ellman's method. Compounds and positive control were dissolved in 1% DMSO. The phosphate buffer (PH 8.0), tacrine, test compounds, and acetylcholinesterase ( $0.02 \text{ U mL}^{-1}$ ) were added in sequence to 96-well plates and incubated for 20 min ( $30 \text{ }^{\circ}\text{C}$ ). The reaction was initiated by the addition of  $20 \text{ }\mu\text{L}$  of 5,5'-dithiobis-(2-nitrobenzoic acid) (DTNB) ( $0.625 \text{ mM}$ ) and  $20 \text{ }\mu\text{L}$  of acetylthiocholine iodide ( $0.625 \text{ mM}$ ) for the AChE inhibitory activity assay respectively. The optical density was measured at  $405 \text{ nm}$  by an ELISA microplate reader. Tacrine ( $\text{IC}_{50} 0.33 \text{ }\mu\text{M}$ ) was used as positive control. All the reactions were performed in triplicate. The percentage inhibition (I %) was calculated as follows:  $\text{I \%} = (1-S)/E \times 100$  (S is the absorbance of the test compound-containing reaction, and E is the absorbance of the control reaction).

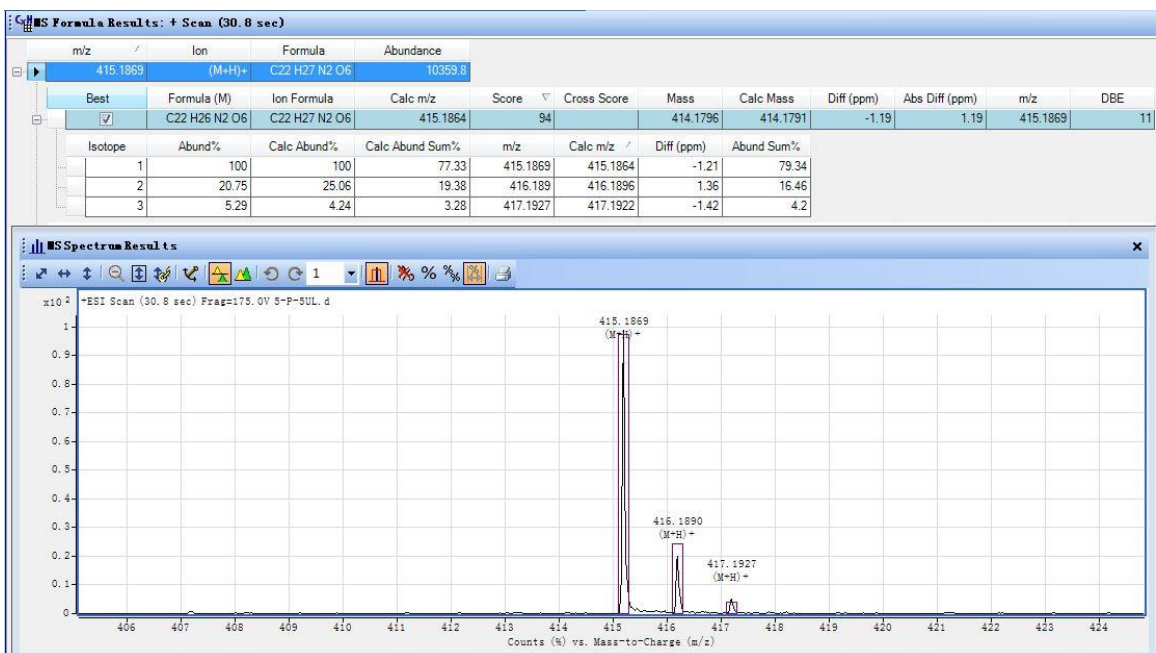

HR-ESI-MS spectrum of **1**

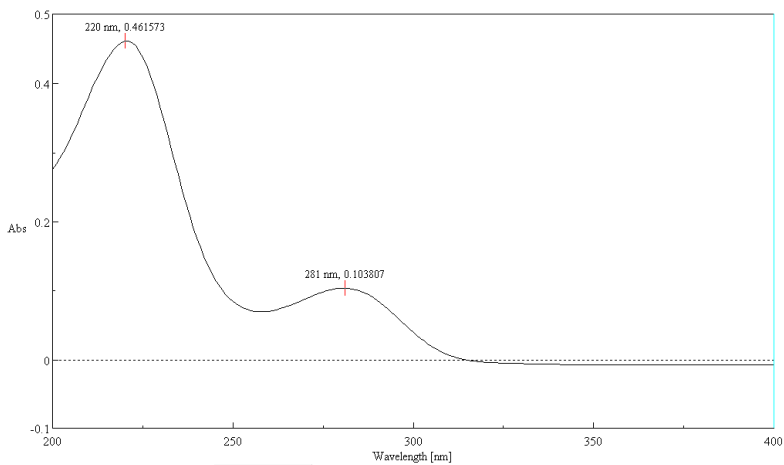

UV spectrum of **1** (CH<sub>3</sub>OH)

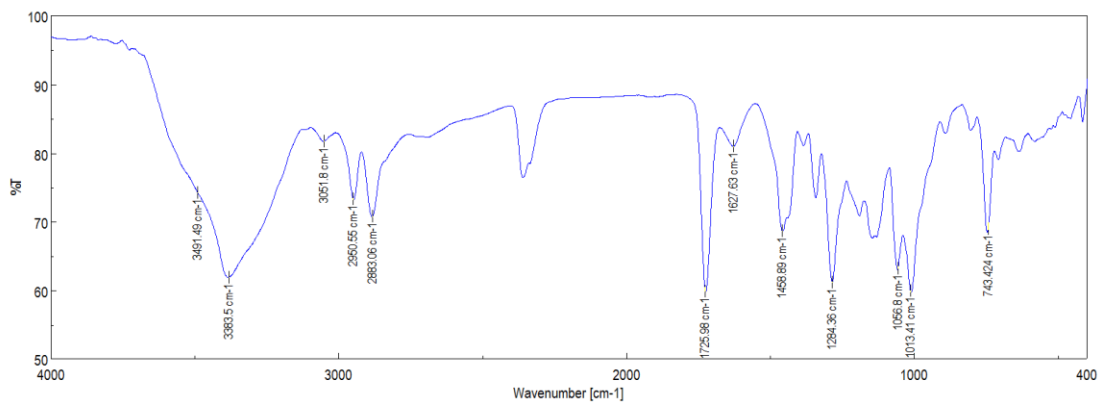

IR spectrum of **1** (KBr disc)

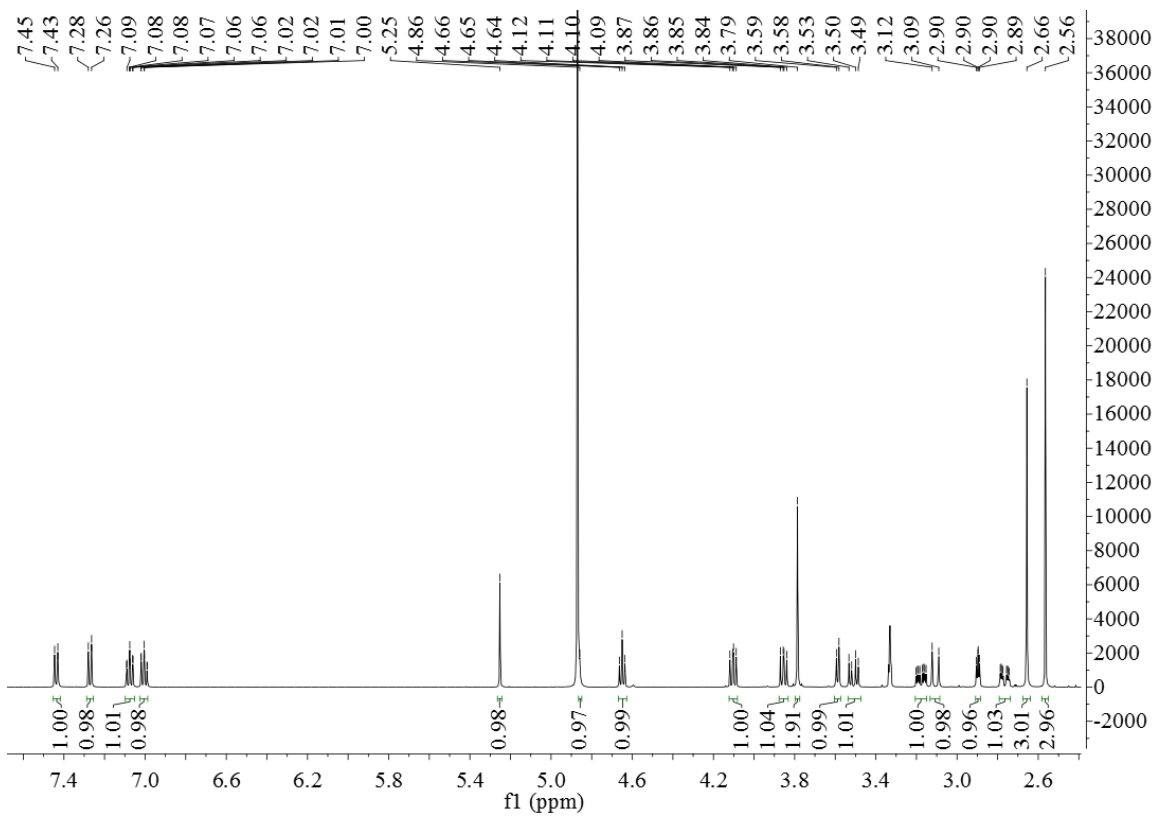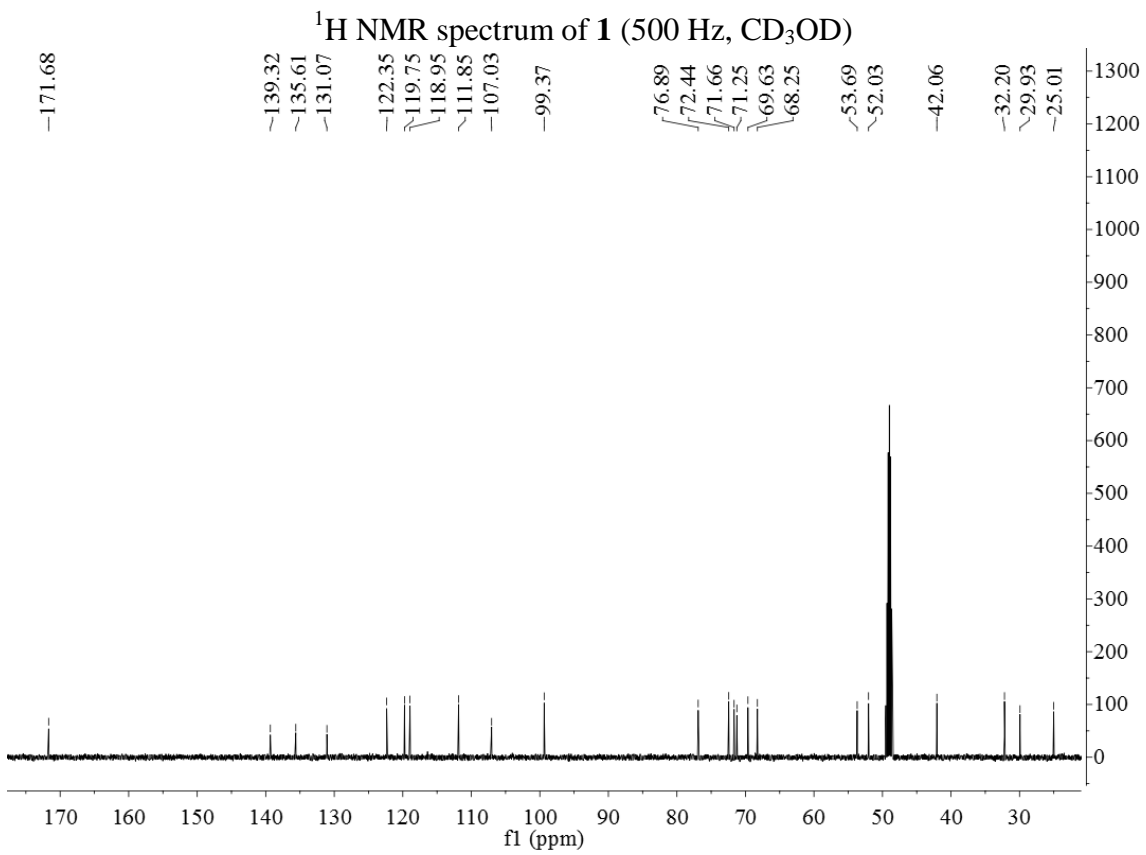

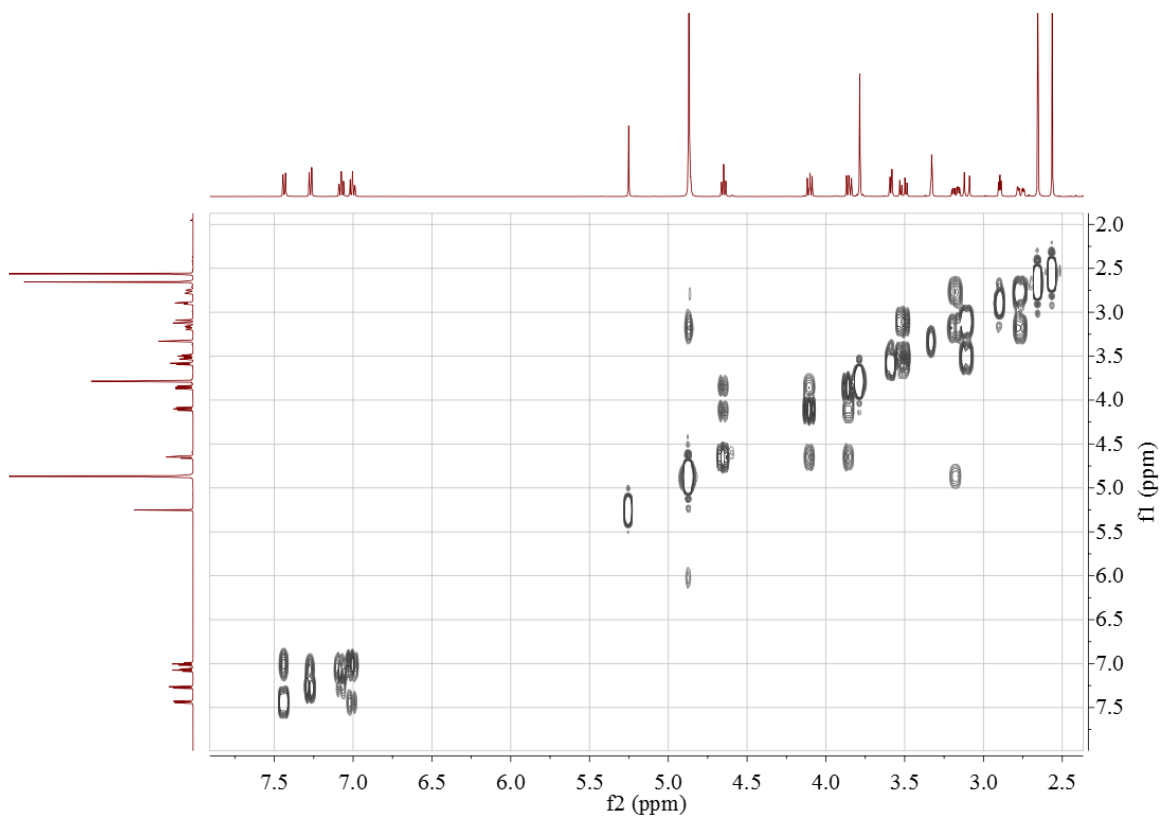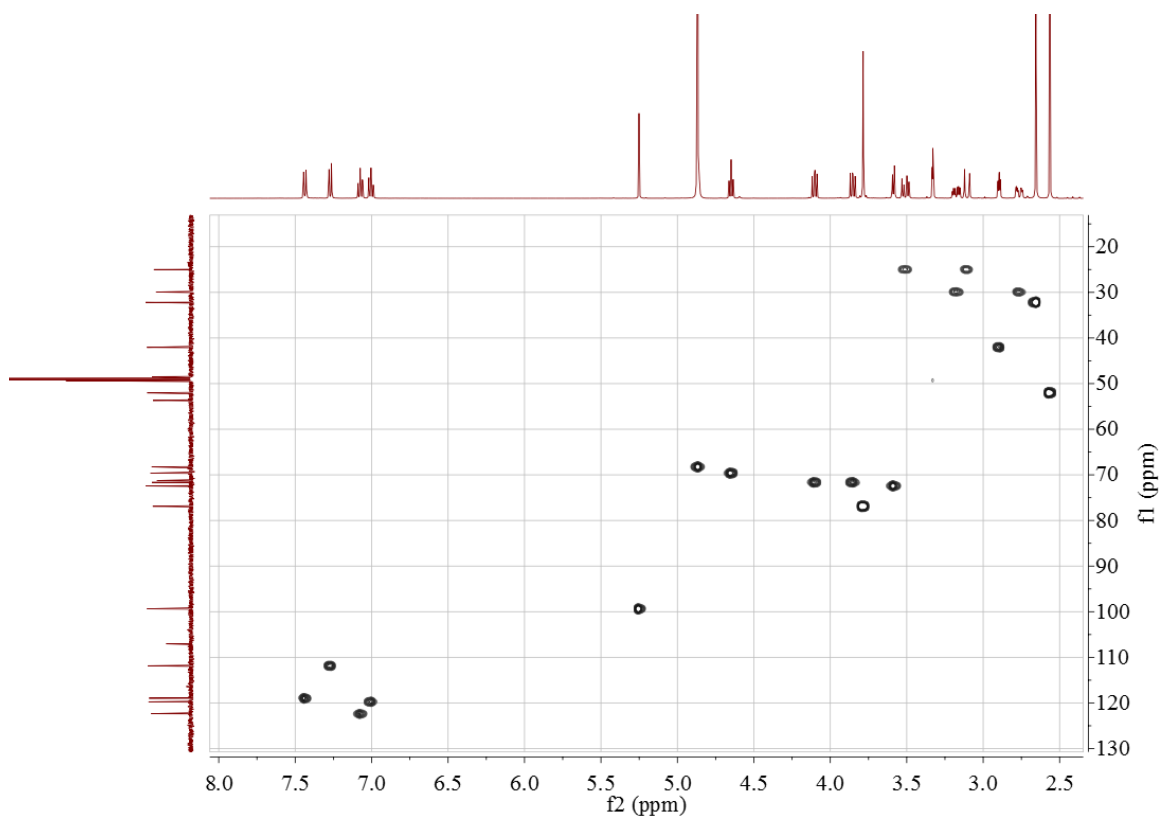

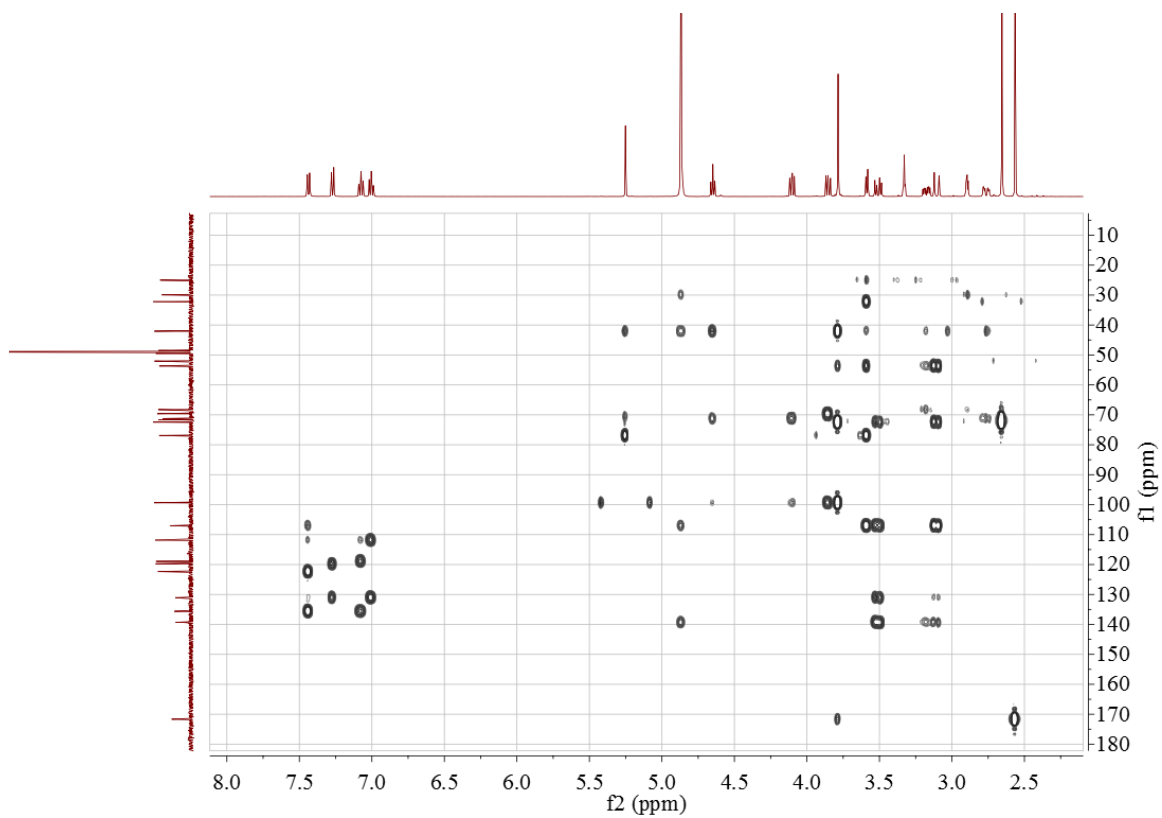

HMBC spectrum of **1** (CD<sub>3</sub>OD)

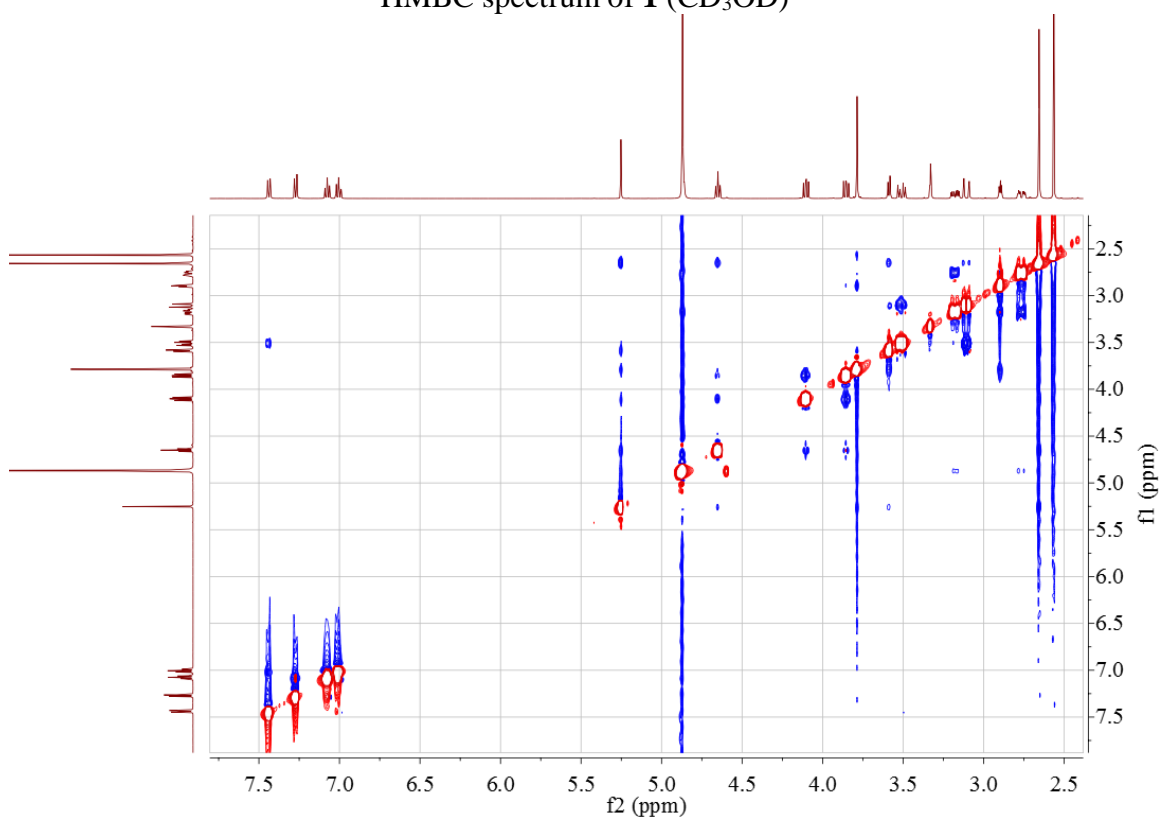

NOESY spectrum of **1** (CD<sub>3</sub>OD)

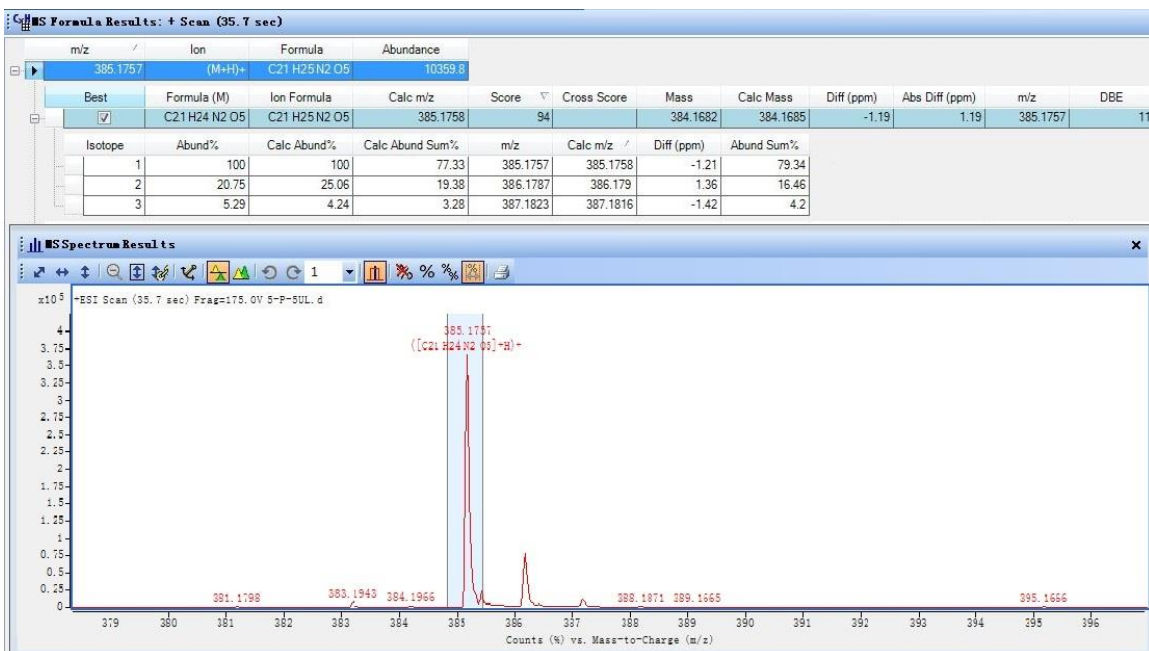

HR-ESI-MS spectrum of **2**

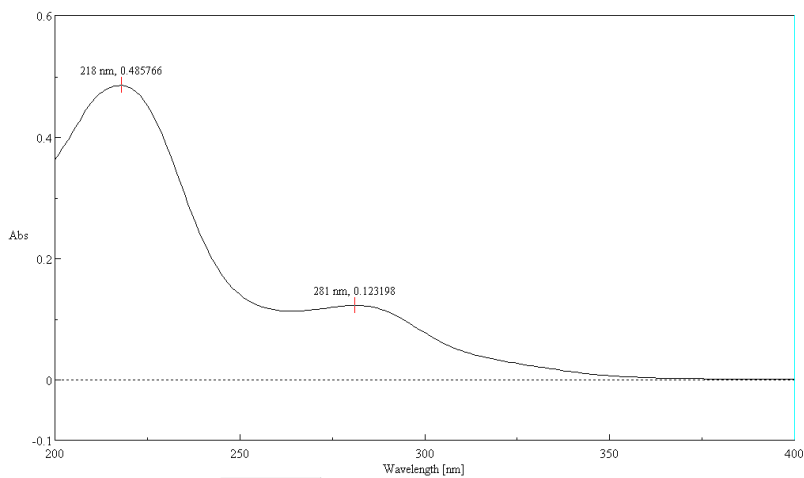

UV spectrum of **2** (CH<sub>3</sub>OH)

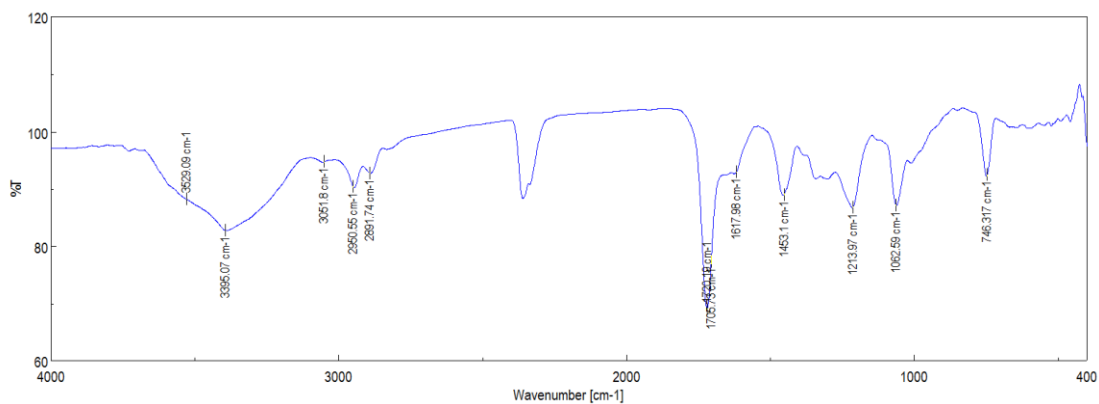

IR spectrum of **2** (KBr disc)



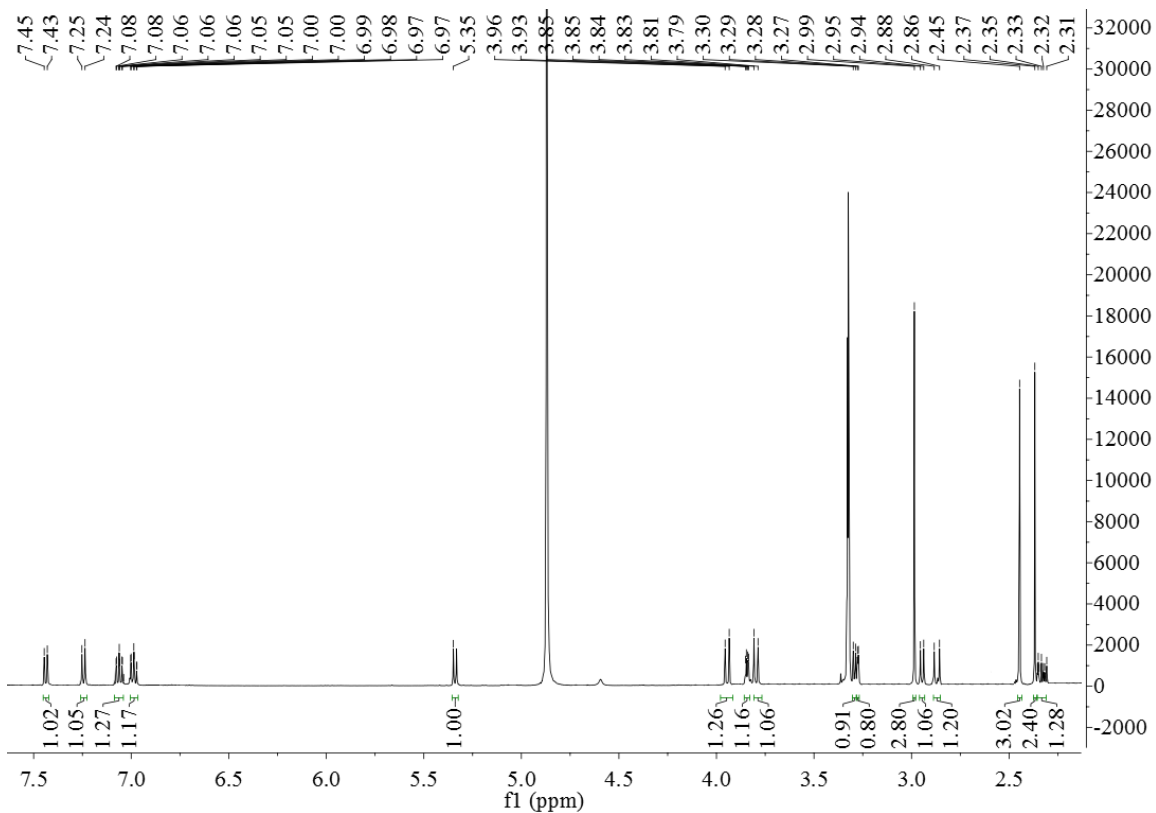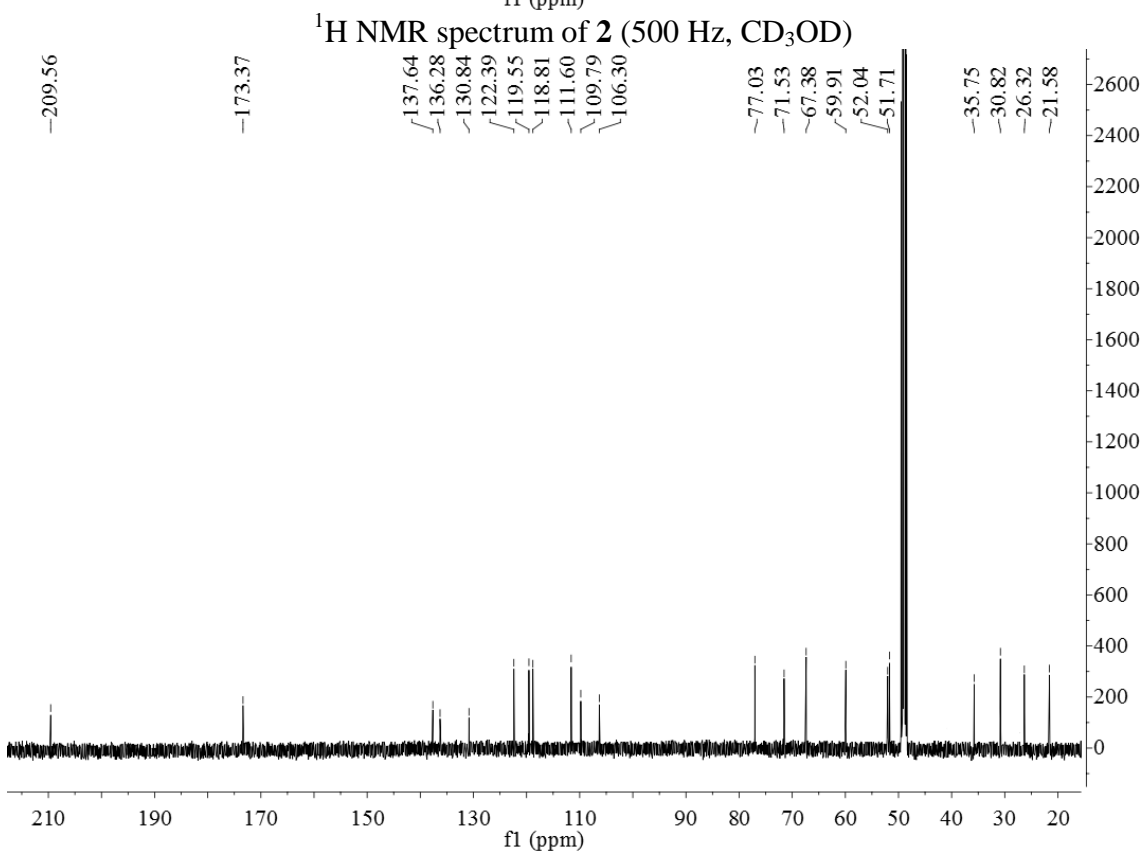

$^{13}\text{C}$  NMR spectrum of **2** (125 Hz,  $\text{CD}_3\text{OD}$ )

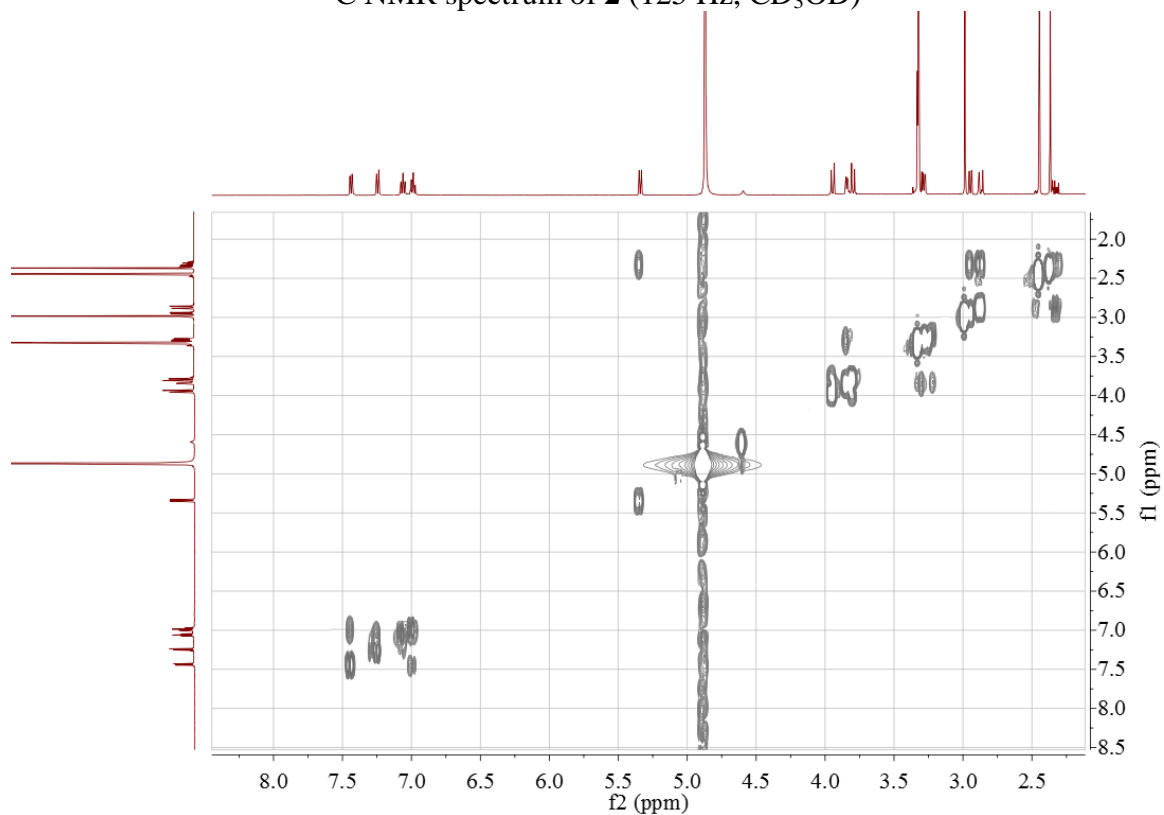

$^1\text{H}$ - $^1\text{H}$  COSY spectrum of **2** ( $\text{CD}_3\text{OD}$ )

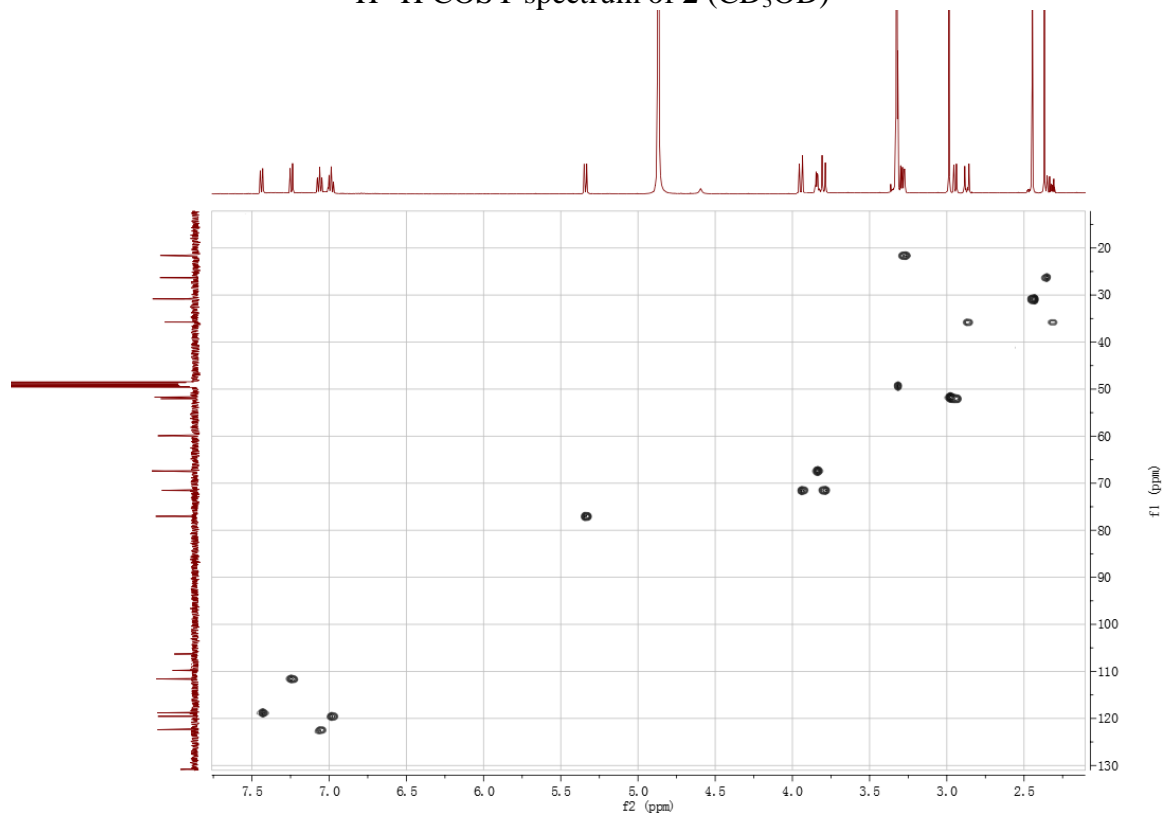

HSQC spectrum of **2** ( $\text{CD}_3\text{OD}$ )

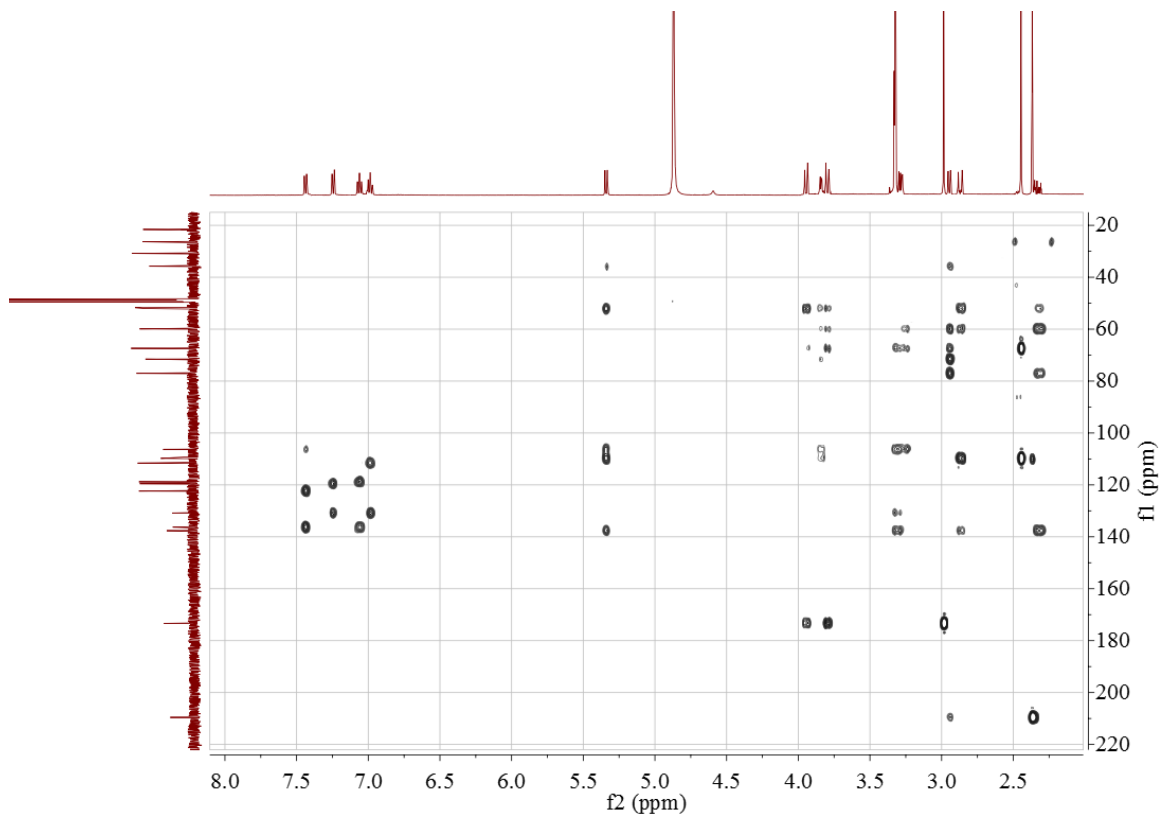

HMBC spectrum of **2** (CD<sub>3</sub>OD)

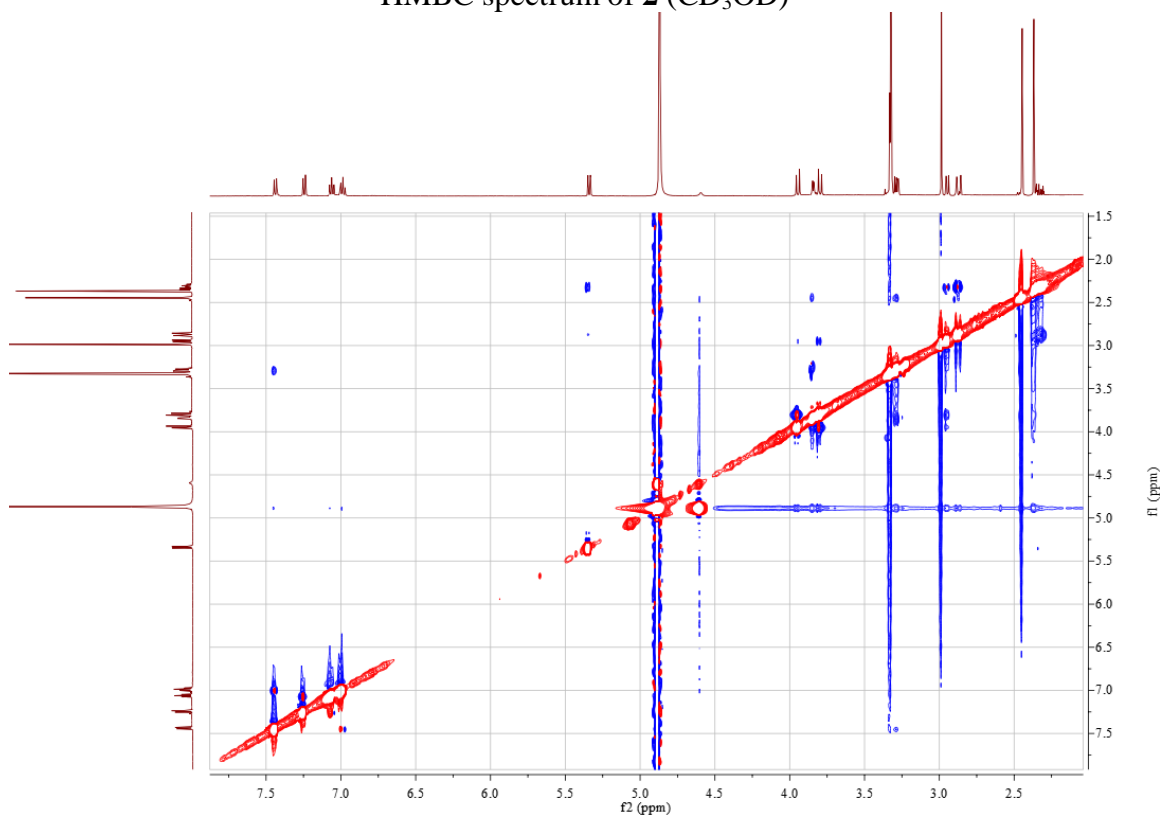

NOESY spectrum of **2** (CD<sub>3</sub>OD)

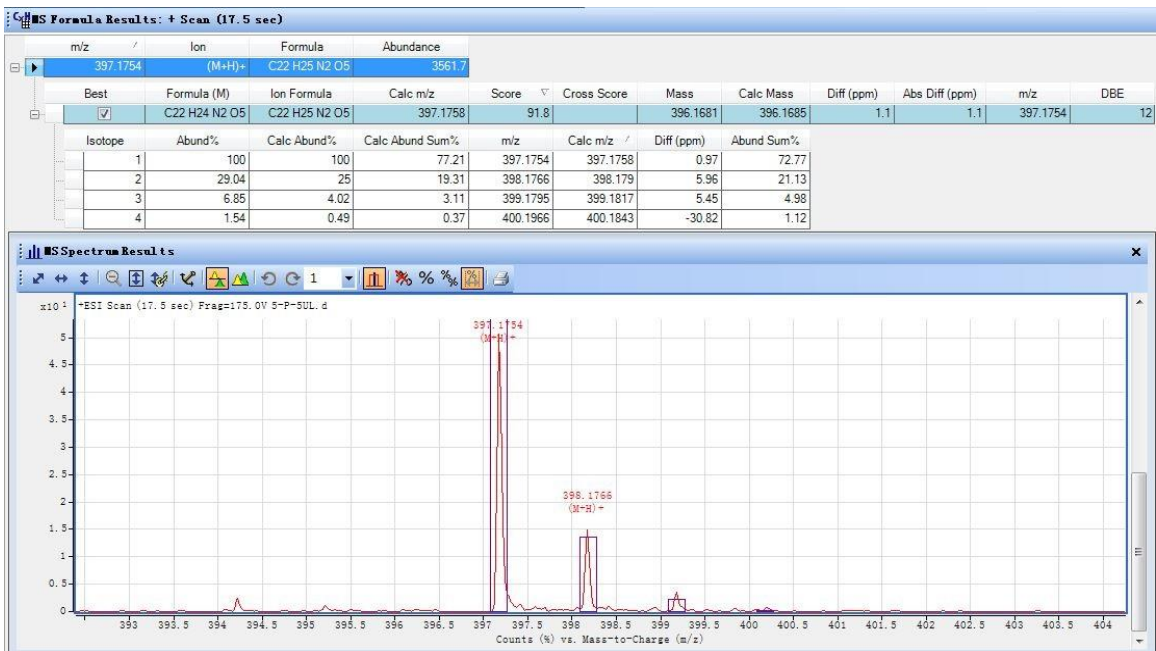

HR-ESI-MS spectrum of **3**

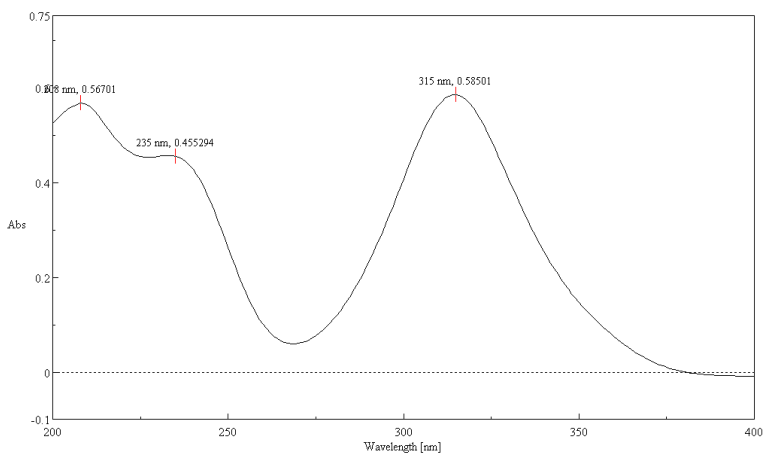

UV spectrum of **3** (CH<sub>3</sub>OH)

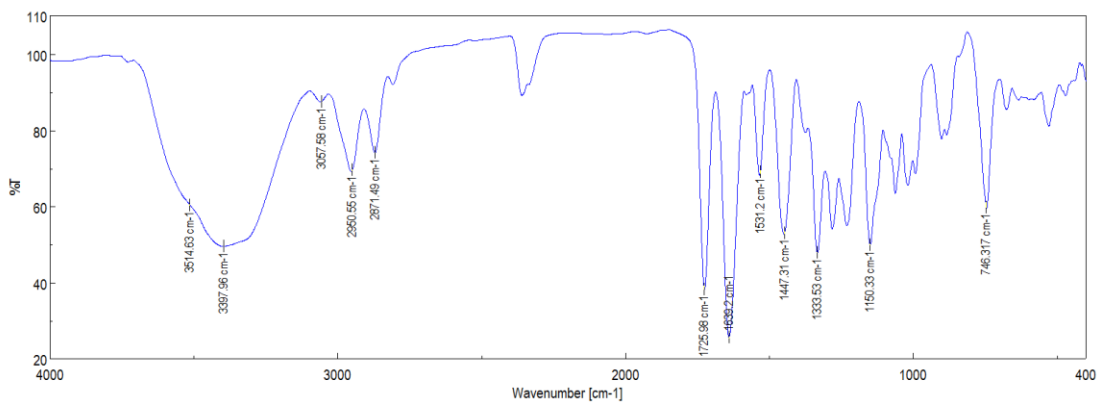

IR spectrum of **3** (KBr disc)

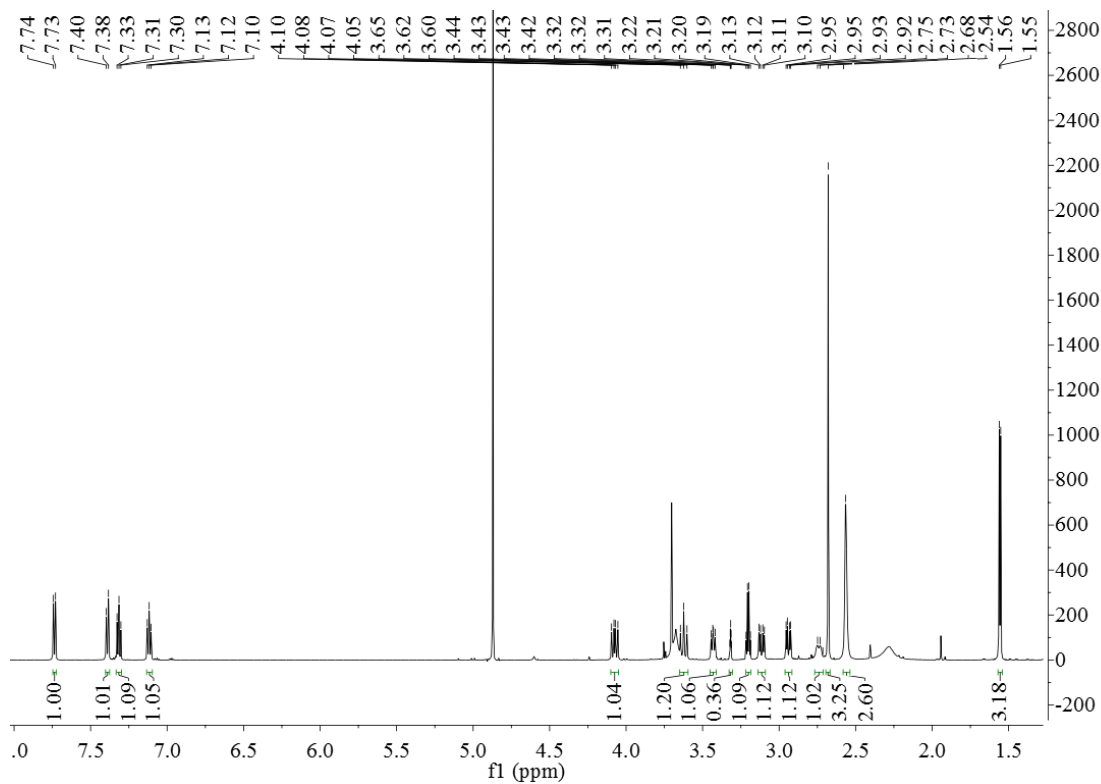

$^1\text{H}$  NMR spectrum of **3** (600 Hz,  $\text{CD}_3\text{OD}$ )

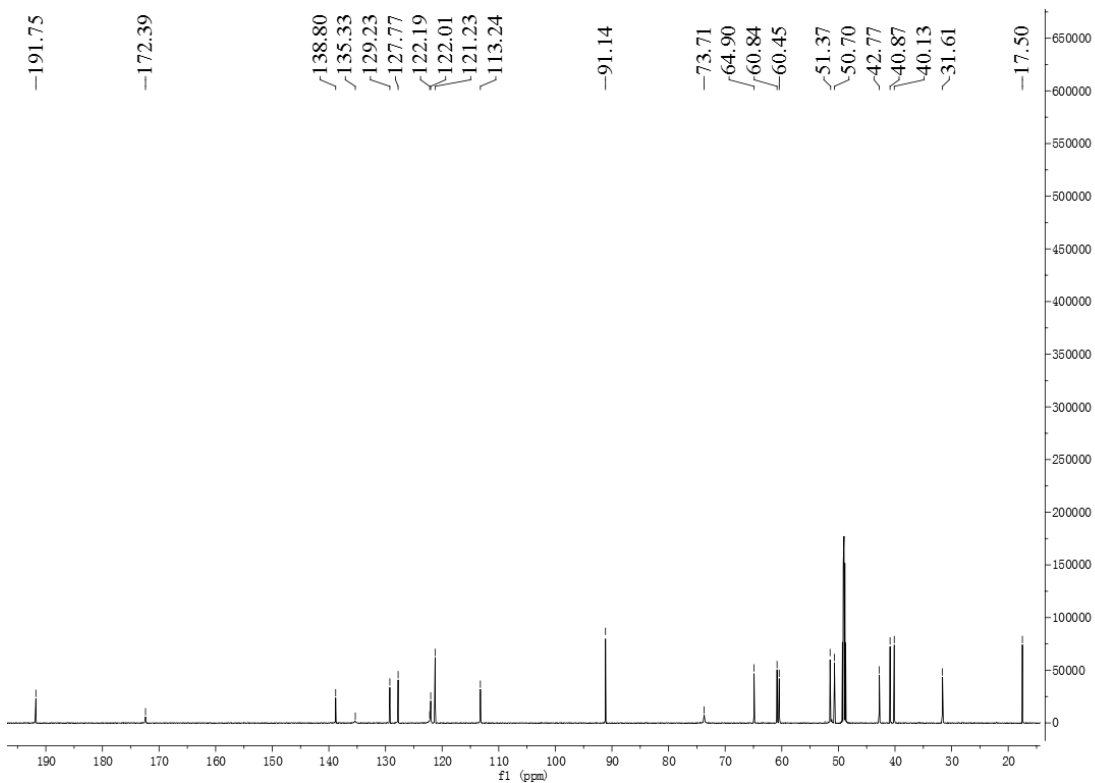

$^{13}\text{C}$  NMR spectrum of **3** (150 Hz,  $\text{CD}_3\text{OD}$ )
